## Repair of APOBEC3G-mutated retroviral DNA *in vivo* is facilitated by the host enzyme uracil DNA glycosylase 2

Karen Salas Briceno and Susan R. Ross\*

Department of Microbiology and Immunology, University of Illinois at Chicago College of Medicine, Chicago IL 60612

\* email: [sross@uic.edu](mailto:sross@uic.edu)

Running Title: *APOBEC3G and UNG*

1 **Abstract**

2 Apolipoprotein B mRNA Editing Enzyme Catalytic Subunit 3 (APOBEC3) proteins are critical for  
3 the control of infection by retroviruses. These proteins deaminate cytidines in negative strand  
4 DNA during reverse transcription, leading to G to A changes in coding strands. Uracil DNA  
5 glycosylase (UNG) is a host enzyme that excises uracils in genomic DNA, which the base excision  
6 repair machinery then repairs. Whether UNG removes uracils found in retroviral DNA after  
7 APOBEC3-mediated mutation is not clear, and whether this occurs *in vivo* has not been  
8 demonstrated. To determine if UNG plays a role in the repair of retroviral DNA, we used  
9 APOBEC3G (A3G) transgenic mice which we showed previously had extensive deamination of  
10 murine leukemia virus (MLV) proviruses. The A3G transgene was crossed onto an UNG and  
11 mouse APOBEC3 knockout background (UNG<sup>-/-</sup>APO<sup>-/-</sup>) and the mice were infected with MLV.  
12 We found that virus infection levels were decreased in A3G UNG<sup>-/-</sup>APO<sup>-/-</sup> compared to A3G  
13 APO<sup>-/-</sup> mice. Deep sequencing of the proviruses showed that there were significantly higher  
14 levels of G-to-A mutations in proviral DNA from A3G transgenic UNG<sup>-/-</sup>APO<sup>-/-</sup> than A3G  
15 transgenic APO<sup>-/-</sup> mice, suggesting that UNG plays a role in the repair of uracil-containing  
16 proviruses. In *in vitro* studies, we found that cytoplasmic viral DNA deaminated by APOBEC3G  
17 was uracilated. In the absence of UNG, the uracil-containing proviruses integrated at higher  
18 levels into the genome than did those made in the presence of UNG. Thus, UNG also functions  
19 in the nucleus prior to integration by nicking uracil-containing viral DNA, thereby blocking  
20 integration. These data show that UNG plays a critical role in the repair of the damage inflicted  
21 by APOBEC3 deamination of reverse-transcribed DNA.

22

23 **Importance**

24 While APOBEC3-mediated mutation of retroviruses is well-established, what role the host base  
25 excision repair enzymes play in correcting these mutations is not clear. This question is  
26 especially difficult to address *in vivo*. Here, we use a transgenic mouse developed by our lab  
27 that expresses human APOBEC3G and also lacks the endogenous uracil DNA glycosylase (*Ung*)  
28 gene, and show that UNG removes uracils introduced by this cytidine deaminase in MLV  
29 reverse transcripts, thereby reducing G-to-A mutations in proviruses. Furthermore, our data  
30 suggest that UNG removes uracils at two stages in infection – in unintegrated nuclear viral  
31 reverse transcribed DNA, resulting in its degradation and second, in integrated proviruses,  
32 resulting in their repair. These data suggest that retroviruses damaged by host cytidine  
33 deaminases take advantage of the host DNA repair system to overcome this damage.

34 **Introduction**

35 Organisms adapt to infectious agents by developing protective responses and conversely, these  
36 agents develop adaptive countermeasures to these responses. Host defenses against infectious  
37 agents include various mechanisms of innate and adaptive immunity. One such family of host  
38 factors, apolipoprotein B mRNA editing enzyme, catalytic subunit 3 (APOBEC3) proteins  
39 belongs to a larger gene family encoding DNA and RNA editing enzymes characterized by the  
40 presence of at least one cytidine deaminase (CDA) domain (1). This family includes the  
41 Activation-Induced Cytidine Deaminase (AID) protein which is responsible for class-switch  
42 recombination and somatic hypermutation of the B cell receptor locus during germinal center  
43 development in lymph nodes, thereby contributing to antibody diversity (2). Cytidine  
44 deaminases, as well as other mutagens such as UV light, cause C-to-U changes in genomic DNA,  
45 which are then read as thymidines by DNA polymerase. (3). As such, the base excision repair  
46 (BER) machinery, including the nuclear form of Uracil DNA Glycosylase (UNG), removes uracils  
47 from DNA and in conjunction with other BER proteins, restores the original sequence, although  
48 since this latter process is error-prone, also causes mutations (4). There are two UNG splice  
49 variants; the mitochondrial form, UNG1, performs a similar role in this compartment (5). If  
50 UNG2, hereafter referred to as UNG, is not present, the uracils are read as thymines by DNA  
51 polymerase II and G-to-A transitions in the opposite strand occur (6). While UNG works on both  
52 double-strand (ds) with mismatches, its preferred template is single-strand DNA (7).

53 When packaged into retroviral virions, APOBEC3 proteins inhibit infection in target cells  
54 by deaminating deoxycytidine residues on minus strand DNA, causing G-to-A mutations in  
55 newly synthesized retrovirus coding strand DNA (8, 9). Deamination leads to degradation of

56 reversed transcribed DNA prior to integration and to G-to-A coding strand mutations of viral  
57 genes in the integrated provirus. *APOBEC3* genes are highly evolving and show strong signs of  
58 positive selection; the number of *APOBEC3* genes varies from species to species, from 1 gene in  
59 mice to 7 genes in primates (1, 10). Human APOBEC3G and 3F were first shown to inhibit HIV-1  
60 lacking the *vif* gene, which encodes a protein expressed at high levels late in infection (11-15).  
61 In Vif-deficient-HIV producer cells, APOBEC3 proteins are packaged into progeny virions via  
62 interaction with the nucleocapsid protein and viral RNA (16-20).

63 APOBEC3 proteins also inhibit replication by a number of CDA-independent mechanisms  
64 (21). *In vitro* studies have suggested that APOBEC3 proteins inhibit elongation and  
65 accumulation of HIV-1 reverse transcription products and we and others have shown that  
66 mouse APOBEC3 mostly restricts MLV and mouse mammary tumor virus (MMTV) by inhibiting  
67 reverse transcription both *in vivo* and *in vitro* (22-27). Mouse retroviruses are not refractory to  
68 APOBEC3-mediated deamination, however, since both *in vitro* and *in vivo* studies using cells  
69 and mice transgenic for human APOBEC3G have demonstrated extensive deamination of MLV  
70 and MMTV sequences (28-30).

71 The role of UNG in uracil removal from APOBEC3G-deaminated DNA has been studied in  
72 tissue culture cells, with conflicting conclusions (31-34). Here, we tested whether UNG  
73 contributed to the repair of APOBEC3G-mediated deamination of replicating MLV *in vivo*, by  
74 generating human APOBEC3G (A3G) transgenic mice that lacked the *Ung* as well as the mouse  
75 *Apobec3* genes. We found that A3G+, *Ung*-containing mice were more highly infected with MLV  
76 than A3G+ *Ung* knockout mice and that proviral DNA from the latter strain had substantially  
77 more G-to-A mutations. *In vitro* studies showed that more APOBEC3G-deaminated proviral DNA

78 was integrated into chromosomes in the absence of UNG, suggesting that UNG removal of  
79 uracils from unintegrated viral nuclear DNA prevents its integration. These data demonstrate  
80 that UNG can counteract the DNA damage inflicted by APOBEC3 deamination.

81

## 82 **Results**

83 We previously reported that transgenic mice expressing human APOBEC3G and deficient in  
84 mouse APOBEC3 (APO<sup>-/-</sup>) were less infected by MLV and that the proviruses found in these  
85 mice showed high levels of G-to-A mutations (29). To determine if UNG played a role in the  
86 repair of these mutations, we generated UNG<sup>-/-</sup>APO<sup>-/-</sup> and A3G<sup>high</sup>UNG<sup>-/-</sup>APO<sup>-/-</sup> mice  
87 (heterozygous for the A3G<sup>high</sup> allele) (29). UNG knockout mice are viable and do not display a  
88 phenotype other than altered class-switch recombination, but accumulate uracil in their  
89 genome (35). Peripheral blood mononuclear cells from A3G<sup>high</sup> mice express APOBEC3G at  
90 levels similar to humans (29). The UNG<sup>-/-</sup>APO<sup>-/-</sup> and A3G<sup>high</sup>UNG<sup>-/-</sup>APO<sup>-/-</sup> mice were crossed  
91 and newborn pups from this cross were infected with MMLV. Newborn APO<sup>-/-</sup> and A3G<sup>high</sup>APO<sup>-/-</sup>  
92 <sup>-/-</sup> mice from similar heterozygote crosses were also infected for comparison. At 16 days and 1-  
93 month post-infection, MLV titers in the spleens or blood of these mice, respectively, were  
94 determined, followed by genotyping for the A3G transgene. Integrated DNA at both time points  
95 and viral RNA levels at 16 days post-infection (dpi) were also determined. At 16 days and 1  
96 month post-infection, expression of APOBEC3G reduced *in vivo* infection by ~2 logs in the  
97 spleen and peripheral blood, in both the presence and absence of UNG compared to the non-  
98 transgenic APO<sup>-/-</sup> and UNG<sup>-/-</sup>APO<sup>-/-</sup> mice (Fig. 1A, 1B and 1D) (28, 29). Infection levels were  
99 higher in the A3G<sup>high</sup>UNG<sup>-/-</sup>APO<sup>-/-</sup> mice than in the A3G<sup>high</sup>APO<sup>-/-</sup> (~3-fold higher titers at both

100 time points). Splenic viral RNA and DNA levels were also reduced by 1 log at 16 dpi in the  
101 A3G<sup>high</sup>UNG<sup>-/-</sup>APO<sup>-/-</sup> compared to the A3G<sup>high</sup>APO<sup>-/-</sup> mice (Fig. 1B and 1C). APO<sup>-/-</sup> and UNG<sup>-/-</sup>  
102 APO<sup>-/-</sup> mice showed no significant difference in infection.

103 We also examined uracil incorporation in MLV DNA, using 2 different techniques. First, a  
104 PCR-based technique developed by the Stiver lab was used to determine the fraction of uracil in  
105 integrated DNA (34). At 16 dpi, there was more uracil incorporated in the MLV sequences found  
106 in the spleens both UNG<sup>+</sup> and UNG<sup>-</sup> A3G<sup>high</sup>APO<sup>-/-</sup> mice compared to the non-transgenic strains  
107 (Fig. 1F). Moreover, the highest levels of uracil were detected in the A3G<sup>high</sup>UNG<sup>-/-</sup>APO<sup>-/-</sup> DNA  
108 samples. Similar results were seen at 1-month post-infection (Fig. 1G), although the integrated  
109 DNA levels were not significantly different (Fig. 1E). We also used a second technique to  
110 examine uracil incorporation, that relies on the inability of Pfu polymerase to elongate in the  
111 presence of uracil compared to Taq polymerase (36). DNA from the infected spleens of UNG<sup>+</sup>  
112 and UNG<sup>-</sup> A3G<sup>high</sup>APO<sup>-/-</sup> mice (16 dpi) amplified more poorly with Pfu polymerase than those  
113 from APO<sup>-/-</sup> and UNG<sup>-/-</sup>APO<sup>-/-</sup> mice (Fig. 1H). Moreover, DNA from the A3G<sup>high</sup>UNG<sup>-/-</sup>APO<sup>-/-</sup>  
114 mice hardly amplified with Pfu polymerase. These data suggest that C-to-U mutations  
115 introduced by APOBEC3G into proviruses are not efficiently repaired in the absence of UNG.

116  
117 **Proviruses in the DNA of A3G<sup>high</sup>UNG KO mice have more G-to-A coding strand mutations.** We  
118 next subjected DNA isolated from the spleens of individual mice to NextGen sequencing, using  
119 primers that spanned the viral genome and that did not amplify endogenous MLV sequences  
120 (Fig. 2A). The proviral DNA isolated from the infected spleens of A3G<sup>high</sup>UNG<sup>-/-</sup>APO<sup>-/-</sup> mice had  
121 almost 2 times more G-to-A mutations than the A3G<sup>high</sup>APO<sup>-/-</sup> mice and both had mutations at

122 >10-fold higher levels than their non-transgenic counterparts (Fig. 2B). No other types of  
123 mutations, including C-to-T mutations indicative of non-coding strand deamination or errors  
124 introduced by BER, varied between the different mouse strains (Fig. 2B). The G-to-A mutations  
125 were high in the UNG- A3G<sup>high</sup> mice in all regions of the genome compared to the UNG+ A3G<sup>high</sup>  
126 mice (Fig. 2C). Interestingly, in addition to there being a hotspot for APOBEC3G mutations in the  
127 3' end of the provirus, as has been seen for other retroviruses, there was a second hotspot in  
128 the *gag* gene (red arrows in Fig. 2C). The G-to-A mutations were predominantly found in the  
129 APOBEC3G motif GG in the coding strand of both the UNG+ and UNG- A3G<sup>high</sup> transgenic mice  
130 (Fig. 2B and 2D).

131 We also examined G-to-A mutations in the long terminal repeats (LTRs). We found  
132 several hotspots in both the U3 and U5 regions (Fig. 2E). Interestingly, the hotspots in U3  
133 occurred in glucocorticoid response elements and binding sites for NFAT1, known to be  
134 important for MLV transcription (37). There were two additional hotspots of unknown  
135 significance in U5.

136 These data confirm our previous findings that APOBEC3G mutates MLV and that the  
137 absence of UNG leads to even higher G-to-A changes. The mutations found in the MLV-infected  
138 A3G<sup>high</sup>UNG-/-APO-/-mice could have a greater effect on both coding regions and virus  
139 transcription, thereby decreasing *in vivo* infectivity.

140

141 **G-to-A mutations in UNG-/- and UNG+/- mice are lower in viral RNA than DNA.** The proviral  
142 DNA isolated from UNG- A3G<sup>high</sup> mice showed substantially more mutations than that from  
143 UNG-containing A3G<sup>high</sup> transgenic mice, and both virus titers and splenic viral RNA levels were



144 reduced. We next examined whether there was a difference in the mutation level in viral RNA  
145 isolated from the spleens of mice 16 dpi. As was seen with the viral DNA, RNA from both strains  
146 of A3G<sup>high</sup> transgenic mice had significantly more G-to-A mutations than the nontransgenic  
147 strains (Fig. 3A). However, while the G-to-A mutation level was 3-fold higher in DNA vs. RNA for  
148 both strains, the level of G-to-A mutations was similar in the viral RNA of the UNG+ and UNG-  
149 A3G<sup>high</sup> transgenic mice, although as was seen for the mutation level in DNA (Fig. 2), there was more  
150 variability in the latter strain (Fig. 3B). Both the level of nonsynonymous mutations and stop  
151 codons was higher in the proviral DNA of the A3G<sup>high</sup>UNG<sup>-/-</sup>APO<sup>-/-</sup>mice than the A3G<sup>high</sup> APO<sup>-/-</sup>  
152 mice (Fig. 3C). This suggests that only the less heavily mutated proviruses are able to replicate.

153

#### 154 **Integration levels are higher in UNG-depleted cells**

155 UNG is the major mammalian uracil deglycosylase that removes uracil from genomic DNA (35).  
156 The increased mutational burden in the proviral DNA found in A3G<sup>high</sup> mice that lacked UNG  
157 could be due lack of removal of uracil from unintegrated viral DNA or from integrated  
158 proviruses. To test at which step uracils are removed, we performed *in vitro* time course assays.  
159 First, we generated 293T-MCAT cells, which stably express the MLV receptor mCAT-1, that also  
160 expressed APOBEC3G. These cells, as well as 293T-MCAT cells not expressing APOBEC3G, were  
161 infected with MLV, and APOBEC3G-containing virus as well virus lacking APOBEC3G was  
162 isolated from the supernatants (Fig. 4A). Because APOBEC3G blocks replication, virus stocks  
163 were normalized by measurement of virion RNA and by western blot analysis (Fig. 4A; Materials  
164 and Methods). Equal amounts (virus RNA equivalents) of APOBEC3G-containing and -lacking  
165 viruses were used to infect 293-MCAT cells which were treated with UNG or control siRNAs,

166 and at 2, 4, 6, 8, and 24 hours post-infection (hpi), the cell extracts were fractionated into  
167 cytoplasmic, nuclear soluble and insoluble fractions (Fig. 4B). UNG knockdown was confirmed  
168 by RT-qPCR (Fig. 4A). DNA was isolated from each of the fractions and subjected to qPCR to  
169 measure viral DNA levels, as well as to analysis of uracil content.

170 Virus reverse transcription was diminished in cells infected with APOBEC3G-containing  
171 virus, irrespective of the expression of UNG. This was true for all unintegrated forms (nuclear  
172 and cytoplasmic) of viral reverse transcripts (Fig. 4C). However, while proviral integration levels  
173 remained low in cells infected with the APOBEC3G-containing virus and expressing UNG, in the  
174 UNG knockdown cells, levels of integrated viral DNA were almost at the level as in cells infected  
175 with virus lacking APOBEC3G (Fig. 4C, integrated). When uracil incorporation into the viral DNA  
176 from different fractions was determined, we found that uracil levels were higher in DNA  
177 isolated from all fractions of cells infected with APOBEC3G-containing virions (Fig. 4D).  
178 Moreover, while uracil levels in cytoplasmic viral DNA in the UNG-expressing and -depleted  
179 cells infected with APOBEC3G-containing virus were similar, the levels in unintegrated nuclear  
180 and integrated proviral DNA from the UNG-depleted cells were higher than that from UNG-  
181 expressing cells. (Fig. 4D). Taken together, these data suggest that 1) UNG removes uracils from  
182 unintegrated viral DNA in the nucleus, and this nicked DNA integrates less efficiently than  
183 uracil-containing, intact viral DNA; and 2) the uracil found in proviruses made in the absence of  
184 UNG causes increased G-to-A mutations.

185

## 186 **Discussion**

187 Previous studies have disagreed as to whether UNG is involved in the repair of APOBEC3-

188 mediated cytidine deamination of retroviral DNA (reviewed in ref. (38)). However, many of  
189 these studies were done with over-expressed APOBEC3 or UNG proteins, and used short-term  
190 replication assays to assess the effects of UNG. Here, we show using an *in vivo* system, in which  
191 virus undergoes multiple rounds of replication, that UNG plays a role in removing the uracils  
192 introduced by APOBEC3G-mediated cytidine deamination into MLV proviruses. As we showed  
193 previously, an APOBEC3G transgene expressed at levels similar to that seen in humans,  
194 introduces “catastrophic” G-to-A mutations into the coding strand of MLV-infected mice,  
195 reducing *in vivo* infection by several logs. In A3G transgenic mice that also lack *Ung*, the G-to-A  
196 mutation rate was increased to even higher levels, which resulted in lower levels of infection.  
197 Thus, UNG could be characterized as a pro-viral factor that aids in the repair of mutations  
198 introduced into the viral genome by the APOBEC3 cytidine deaminases. That lack of UNG did  
199 not cause even higher rates of mutation and greater effects on infection is likely due to the  
200 other BER enzymes that repair uracil in DNA, such as selective monofunctional uracil-DNA  
201 glycosylase (SMUG1), thymidine DNA glycosylase (TDG) and methyl CpG binding domain 4  
202 (MBD4) (35).

203         In *in vitro* studies, incorporation of APOBEC3G into MLV particles reduced cytoplasmic  
204 and unintegrated reverse transcripts, as well as integrated DNA, independent of UNG  
205 expression compared to virions lacking APOBEC3G. This is likely because APOBEC3G, in addition  
206 to deaminating newly synthesized viral DNA, can block reverse transcription (9). When  
207 APOBEC3G-containing MLV was used to infect tissue culture cells in which UNG levels were  
208 reduced by siRNA, the level of unintegrated nuclear DNA was similar in the UNG-expressing and  
209 –negative cells infected with APOBEC3G-containing MLV. In contrast, we found that integration

210 of proviral DNA was increased in UNG-depleted cells relative to cells expressing UNG.  
211 Additionally, the level of uracil incorporated in nuclear unintegrated viral and proviral DNA was  
212 higher in the UNG-deficient cells compared to the UNG-expressing cells. This suggests that  
213 when UNG acts on unintegrated viral DNA, the cleavage sites are not repaired by the BER  
214 machinery, likely leading to nicked DNA that does not efficiently integrate. In contrast,  
215 proviruses containing uracil would be cleaved by UNG after integration, and repaired using the  
216 cellular BER machinery; this would not occur in UNG-deficient cells and could explain the higher  
217 G-to-A mutation rate in the A3G<sup>high</sup>UNG<sup>-/-</sup> mice compared to the A3G<sup>high</sup> mice. The repair of  
218 uracil in integrated proviruses by UNG also explains why virus replication levels were higher in  
219 A3G<sup>high</sup> APO<sup>-/-</sup> than A3G<sup>high</sup> UNG<sup>-/-</sup>APO<sup>-/-</sup> mice. Although BER is known to be error-prone, we  
220 did not see evidence of increased mutations other than G-to-A, suggesting that instead DNA  
221 polymerase recognized uracils as thymidines in the integrated proviruses during DNA  
222 replication.

223 HIV's replication complexes, consisting of viral capsid, reverse transcriptase, integrase and  
224 nucleic acid, can enter the nucleus through interaction with the nuclear pore, and as a result,  
225 HIV can infect quiescent cells (39). MLV, in contrast, requires cell division and nuclear  
226 membrane breakdown for complex entry because it lacks viral proteins that interact with the  
227 nuclear pore complex; it thus can only efficiently infect cycling cells (39). Recent studies have  
228 suggested that HIV reverse transcription largely occurs in the nucleus (40-43). Whether this is  
229 also the case for gammaretroviruses is not known. However, cytoplasmic viral DNA isolated  
230 from cells infected with APOBEC3G-containing virus had significant levels of uracil, suggesting  
231 that at least some reverse transcription occurs prior to association of the reverse transcription

232 complex (RTC) with the nucleus (Fig. 4D). However, the level of uracil in cytoplasmic DNA did  
233 not differ in UNG-containing and –depleted cells, but did in the nuclear fractions. Thus, UNG,  
234 which is a nuclear enzyme, is likely removing uracils in the nucleus. Although UNG can remove  
235 uracils from double-stranded DNA, its activity is higher on single-stranded DNA, such as that  
236 occurs at replication foci or during reverse transcription (35). If some reverse transcription and  
237 APOBEC3G-mediated deamination occurs in the nucleus or during cell division, then nuclear  
238 UNG could cause nicks in unintegrated viral DNA through base excision. Further studies are  
239 required to elucidate how and where MLV reverse transcription, APOBEC3G-deamination and  
240 UNG excision occur.

241

## 242 **Materials and Methods**

243 **Ethics statement.** All mice were housed according to the policy of the Animal Care Committee  
244 of the University of Illinois at Chicago, and all studies were performed in accordance with the  
245 recommendations in the Guide for the Care and Use of Laboratory Animals of the National  
246 Institutes of Health. The experiments performed with mice in this study were approved by the  
247 committee (UIC ACC protocol #18-168).

248

249 **Mice.** A3G<sup>high</sup>APO<sup>-/-</sup> mice and APO<sup>-/-</sup> mice were previously described (23, 29). UNG<sup>-/-</sup> were a  
250 generous gift from Amy Kenter (6). Conditions for genotyping the A3G transgene, as well as the  
251 mouse *Apobec3* gene, were reported previously (23, 29). Knockout of the *Ung* gene was  
252 verified using the following primers: (UNGKO F primer 5'-GCCGGTCTTGTGATCAGGATGATC-3'  
253 and UNGKO R primer 5'-CAGTGCCTATAACTTCAGCTCC-3').

254

255 **Cell culture.** NIH3T3 cells were cultured in Dulbecco's modified Eagle's medium (DMEM)  
256 supplemented with 10% fetal bovine serum (FBS), L-glutamine, and penicillin/ streptomycin.  
257 293T/mCAT-1 cells were a gift from Lorraine Albritton (44). 293T/A3G/mCAT-1 cells expressing  
258 human APOBEC3G were generated by co-transfecting A3G expression and puromycin-  
259 resistance plasmids. The 293T/mCAT-1 and 293T/A3G/mCAT-1 cells were cultured in Dulbecco's  
260 modified Eagle's medium (DMEM) supplemented with 8% donor bovine serum (DBS), L-  
261 glutamine, penicillin/ streptomycin containing G418 (Goldbio) or G418 plus puromycin (Gibco),  
262 respectively.

263

264 **Virus isolation.** MMLV was isolated from the supernatants of stably infected NIH3T3 cells (cells  
265 in which infection is allowed to spread to 100% of the culture and maintained in this state  
266 thereafter), as previously described (25, 45). Virus was also isolated from MLV-infected  
267 293T/mCAT-1 and 293T/A3G/mCAT-1 cells. Supernatants were passed through a 0.45- $\mu$ m filter,  
268 treated with 20 U/ml DNase I (Sigma) at 37°C for 30 min and centrifuged through a 30% sucrose  
269 cushion, as previously described. After resuspension, titers of MLV were determined on NIH3T3  
270 cells (see "Virus titers," below).

271 Viruses were subjected to reverse transcriptase quantitative PCR (RT-qPCR), and the  
272 number of viruses was estimated by standard curve analysis from the amount of virus-specific  
273 RNA, using primers located in the env gene (MMLV F primer, 5'-CCTACTACGAAGGGGTTG-3';  
274 MMLV R primer, 5'-CACATGGTACCTGTAGGGGC-3'). Equal amounts of virus, normalized by RNA  
275 levels, were also analyzed by Western blots (Fig. 4A).

276

277 **In vivo infections.** One-to-2-day-old mice were infected by intraperitoneal injection of  $2 \times 10^3$  ICs  
278 of MMLV and spleens were harvested at 16 days dpi, as previously described (17). Mice were  
279 anesthetized and blood was obtained via retro-orbital bleed. Plasma and peripheral blood  
280 mononuclear cells were collected with heparinized Natelson tubes (Fisher Scientific) into 8mM  
281 EDTA in PBS. Plasma samples were serially diluted to titer virus. For cellular DNA isolation, red  
282 blood cells were lysed with ACK lysis buffer (150mM NH<sub>4</sub>Cl, 1 M KHCO<sub>3</sub>, 0.1mM EDTA, pH 7.4)  
283 and cells were washed twice with PBS and finally diluted in 200 uL of PBS. Samples were stored  
284 at -20 °C prior DNA isolation.

285

286 **Virus titers.** MMLV infection levels in the spleens and peripheral blood of the infected mice or  
287 the supernatants of infected 293T/mCAT-1 and 293T/A3G/mCAT-1 cells were determined by  
288 infectious center (IC) assays using a focal immunofluorescence assay, as previously described  
289 (37). Briefly, NIH3T3 cells were infected with 10-fold serial dilutions of splenocytes or virus,  
290 respectively. At 4 dpi, the plates were stained a monoclonal antibody (538) that recognizes the  
291 Env protein. After staining with fluorescein-conjugated secondary antibody, the colonies of  
292 green cells were quantified by automated counting using a Keyence fluorescence microscope.  
293 Viral titers (ICs) were calculated from the numbers of fluorescent colonies corrected for the  
294 dilution factors of the viral stocks in each plate.

295

296 **Deep Sequencing of nearly full-length MMLV genomic DNA and RNA.** DNA from the spleens of  
297 MLV-infected APO<sup>-/-</sup> A3G<sup>high</sup>, UNG<sup>-/-</sup> APO<sup>-/-</sup> A3G<sup>high</sup> mice and APO<sup>-/-</sup>, UNG<sup>-/-</sup> APO<sup>-/-</sup> control mice

298 was isolated using the DNeasy Blood & Tissue Kit (Qiagen). RNA was also isolated from MMLV-  
299 infected splenocytes of the mice using Trizol reagent (Ambion), and cDNA was reverse  
300 transcribed using AccuScript High Fidelity First-Strand cDNA Synthesis kit (Agilent Technologies).  
301 Three MMLV fragments that covered most of the proviral genome were amplified from DNA  
302 and RNA using the primers described in Table I (Fig. 2A; Table 1). Briefly, the three amplicons  
303 were purified (Agencourt AMPure XP) and quantified (Nanodrop) prior to using the Celero™  
304 DNA-Seq Library Preparation Kit (NuGEN) to construct libraries. These libraries were analyzed  
305 using an Agilent Tapestation 4200 for size and concentration (Agilent Technologies). Libraries  
306 were then pooled based on nM concentration and the resulting pool prepared for sequencing  
307 by measuring concentration by Qubit 4 (Life Technologies). The pooled libraries were run on an  
308 Illumina MiniSeq instrument at 2 x 150bp using MiniSeq Reagent MO Kit, (300 cycles) (#FC-420-  
309 1004 Illumina Inc).

310

311 **Sequence analysis.** Raw reads were mapped to the Moloney murine leukemia virus (J02255)  
312 using BWA MEM(46) (total mapped reads average:  $1.3 \times 10^5$ ). PCR duplicates were removed  
313 using Picard MarkDuplicates (47), and indel realignment was performed using IndelRealigner  
314 from GATK(48). Nucleotide counts per position were generated at each position in the  
315 reference using bam-readcount (Bam-Readcount: Generate Metrics at Single Nucleotide  
316 Positions., n.d.) and the effect of substitutions on the translated protein sequence were  
317 assessed for the open read frames in the virus: positions 621-2237 (Gag polyprotein pr65),  
318 positions 2238-5834 (Pol polyprotein), and 5777-7774 (Env polyprotein). Distributions of both  
319 single nucleotide conversions and dinucleotide conversions were compiled over all positions in



320 the genome, in particular G->A and C->T conversions for single nucleotides, and GG->AG, GC-  
321 >AC, GA->AA, and GT->AT conversions for dinucleotides. These conversion frequencies were  
322 also averaged over 1kb bins across the reference sequence. Differential statistics of conversion  
323 frequencies between sample groups were tested using the Wilcox test in R. G to A/kb, C to T/kb  
324 and all mutations/kb calculations were made counting total number of G to A, C to T or the rest  
325 of mutations and dividing these numbers between kb reads.

326

327 **RNAi.** For the depletion of UNG in human cells, siRNA from Ambion (catalog no. 4390824) was  
328 used. Briefly, 2293T/mCAT-1 and 293T/A3G/mCAT-1 were transfected using the reverse-  
329 transfection method of Lipofectamine RNAi MAX reagent (Invitrogen). siRNA depletion was  
330 carried out for 48 h. RNA was isolated using the RNeasy minikit (Qiagen). RT-qPCR was  
331 performed using the GoTaq® 1-Step RT-qPCR System (Promega). Knockdowns were verified  
332 using the primers: 5'CTCATAAGGAGCGAGGCTGG3' and 5'GTACATGGTGCCGCTTCCTA3'.

333

334 **In vitro infections to determine reverse transcription early events.** 293T/mCAT-1 and  
335 293T/A3G/mCAT-1 cells were seeded at  $1 \times 10^5$  cells per 0.5 ml of medium in a 24-well  
336 format. Virus (genome equivalent of a MOI of 1) was added in the presence of 8 µg/ml  
337 polybrene (Sigma Aldrich) and the cells were incubated on ice for 1 h to allow virus binding.  
338 Cells were washed in cold phosphate-buffered saline, 0.5 ml of DMEM was added, and  
339 incubated at 37 °C for 0-6 h, as indicated in the figures. At each harvest time point, the cells  
340 were fractionated by the modify rapid, efficient, and practical (REAP) method as previously  
341 described (49). Total, integrated and cytoplasmic DNA was purified from the REAP fractions

342 using DNeasy kits (Qiagen). The purity of the fractions was determined by western blotting with  
343 antibodies to  $\beta$ -tubulin (cytoplasmic fraction) (GeneTex) and laminin B1 (nuclear fraction) (Cell  
344 signaling Technology). Unintegrated nuclear DNA was isolated using the Hirt DNA isolation  
345 method, appropriate for extraction of low molecular weight DNA (50). Briefly, Hirt buffer (0.09M  
346 Tris pH7.6, 0.01M EDTA, 0.6% SDS) was added to the REAP nuclear fraction, and incubated for 10  
347 minutes. After,  $\frac{1}{4}$  volume of 5.0M NaCl was added and mixed gently. The lysis mixture was  
348 incubated at 4°C overnight. The mixture was centrifugated at 13,000 rpm for 15 min at 4°C, and  
349 then supernatant was carefully removed, mixed with Proteinase K (0.1 mg/mL), and incubated  
350 at 56°C for 2 hours, followed by phenol-chloroform extraction and ethanol precipitation. The  
351 pellet was diluted in Phosphate-buffered saline (PBS) to isolated the integrated DNA. The DNA  
352 from the different fractions was subjected to real-time qPCR.

353

354 **Real-time qPCR.** qPCRs were performed with MLV SuMLV primers using a Power SYBR green  
355 PCR kit (Promega) and the QuantStudio 5 Real-Time PCR System (Applied Biosystems). DNA  
356 quantifications were normalized to glyceraldehyde-3-phosphate dehydrogenase (GAPDH), or to  
357 the mitochondrial gene for cytochrome b (mtCytb) in the cytoplasmic fraction. The  
358 amplification conditions were 50°C for 2 min, 95°C for 10 min and 40 cycles of 95°C for 15 s, and  
359 60°C for 1 min. The efficiency of amplification was determined for each primer pair by  
360 generating a standard curve with 10-fold serial dilutions of a known concentration of DNA. For  
361 each primer pair, a no-template control was included, and each sample was run in triplicate.  
362 Levels of integrated MLV were determined by Alu-gag nested PCR (45). Briefly, 50 ng of total  
363 DNA was used to perform a PCR using a forward primer that targeted genomic *alu* sequences

364 randomly located near integrated proviruses, and MLV-specific *gag* reverse primer. The PCR  
365 product was diluted 10-fold and 2.4  $\mu$ l was used as input for the second qPCR reaction, which  
366 was performed using MLV LRT primers. The qPCR was normalized to GAPDH using the same  
367 amount of input total DNA sample to measure integrated MLV. Copies of unintegrated DNA  
368 were determined by qPCR with SuMLV primers and normalized to ng of total DNA in the  
369 sample.

370

371 **Uracil content of viral DNA.** Excision-qPCR was used to determine uracil-containing fraction of  
372 viral DNA as described (51) with some modifications. The sample was split into two equal  
373 portions and one portion is treated with UDG. Briefly, 0.125 units of UDG (NEB) was added into  
374 the Promega qPCR master mix to excise uracils from viral DNA. The qPCR thermocycler reaction  
375 was modified to include the UDG reaction time and heat-cleavage of the resulting abasic sites.  
376 Thermocycler program we used for this reaction was: 37 °C for 30 min (UDG reaction), 95 °C for  
377 5 min (abasic site cleavage) and 40 cycles of denaturation at 95 °C for 10 sec and annealing and  
378 extension at 60 °C for 30 sec. SuMLV primers were used in cytoplasmic, nuclear unintegrated  
379 and integrated fraction, to amplify viral DNA. Primers targeting GAPDH or mCytb were used to  
380 calculate Frac UDNA using the  $\Delta\Delta C_t$  method in the nuclear or cytoplasmic fractions,  
381 respectively.

382 The Taq/Pfu PCR method was also used to examine DNA uracil content, as described (36). DNA  
383 from spleen at 16 dpi were used as templates for Taq and Pfu amplification with SuMLV  
384 primers.

385

386 **Statistical analysis and data deposition.** Data shown are the averages of at least 3 independent  
387 experiments, or as otherwise indicated in the figure legends. Statistical analysis was performed  
388 using GraphPad Prism 9.0.2 software. Tests used to determine significance are indicated in the  
389 figure legends. Raw data for all figures are deposited in a Mendeley dataset at doi:  
390 10.17632/jmpdfkvd2j.1.

391

## 392 **ACKNOWLEDGEMENTS**

393

394 We thank David Ryan for assistance with mouse breeding, Alexya Aguilera for providing virus  
395 and helpful suggestions and Amy Kenter for providing the UNG KO mice. This study was  
396 supported by National Institute for Allergy and Infectious Disease (R01AI 085015 to SRR).

397

- 398 1. **LaRue RS, Andresdottir V, Blanchard Y, Conticello SG, Derse D, Emerman M, Greene WC,**  
399 **Jonsson SR, Landau NR, Lochelt M, Malik HS, Malim MH, Munk C, O'Brien SJ, Pathak VK,**  
400 **Strebel K, Wain-Hobson S, Yu XF, Yuhki N, Harris RS.** 2009. Guidelines for naming nonprimate  
401 APOBEC3 genes and proteins. *Journal of virology* **83**:494-497.
- 402 2. **Peled JU, Kuang FL, Iglesias-Ussel MD, Roa S, Kalis SL, Goodman MF, Scharff MD.** 2008. The  
403 biochemistry of somatic hypermutation. *Annu Rev Immunol* **26**:481-511.
- 404 3. **Iyama T, Wilson DM, 3rd.** 2013. DNA repair mechanisms in dividing and non-dividing cells. *DNA*  
405 *Repair (Amst)* **12**:620-636.
- 406 4. **Yonekura S, Nakamura N, Yonei S, Zhang-Akiyama QM.** 2009. Generation, biological  
407 consequences and repair mechanisms of cytosine deamination in DNA. *J Radiat Res* **50**:19-26.
- 408 5. **Akbari M, Visnes T, Krokan HE, Otterlei M.** 2008. Mitochondrial base excision repair of uracil  
409 and AP sites takes place by single-nucleotide insertion and long-patch DNA synthesis. *DNA*  
410 *Repair (Amst)* **7**:605-616.
- 411 6. **Nilsen H, Stamp G, Andersen S, Hrivnak G, Krokan HE, Lindahl T, Barnes DE.** 2003. Gene-  
412 targeted mice lacking the Ung uracil-DNA glycosylase develop B-cell lymphomas. *Oncogene*  
413 **22**:5381-5386.
- 414 7. **Slupphaug G, Eftedal I, Kavli B, Bharati S, Helle NM, Haug T, Levine DW, Krokan HE.** 1995.  
415 Properties of a recombinant human uracil-DNA glycosylase from the UNG gene and evidence  
416 that UNG encodes the major uracil-DNA glycosylase. *Biochemistry* **34**:128-138.
- 417 8. **Cullen BR.** 2006. Role and mechanism of action of the APOBEC3 family of antiretroviral  
418 resistance factors. *J Virol* **80**:1067-1076.
- 419 9. **Stavrou S, Ross SR.** 2015. APOBEC3 Proteins in Viral Immunity. *J Immunol* **195**:4565-4570.

- 420 10. **Daugherty MD, Malik HS.** 2012. Rules of engagement: molecular insights from host-virus arms  
421 races. *Annu Rev Genet* **46**:677-700.
- 422 11. **Sheehy AM, Gaddis NC, Choi JD, Malim MH.** 2002. Isolation of a human gene that inhibits HIV-1  
423 infection and is suppressed by the viral Vif protein. *Nature* **418**:646-650.
- 424 12. **Bishop KN, Holmes RK, Sheehy AM, Davidson NO, Cho SJ, Malim MH.** 2004. Cytidine  
425 deamination of retroviral DNA by diverse APOBEC proteins. *Curr Biol* **14**:1392-1396.
- 426 13. **Wiegand HL, Doehle BP, Bogerd HP, Cullen BR.** 2004. A second human antiretroviral factor,  
427 APOBEC3F, is suppressed by the HIV-1 and HIV-2 Vif proteins. *EMBO J* **23**:2451-2458.
- 428 14. **Liddament MT, Brown WL, Schumacher AJ, Harris RS.** 2004. APOBEC3F properties and  
429 hypermutation preferences indicate activity against HIV-1 in vivo. *Curr Biol* **14**:1385-1391.
- 430 15. **Zheng YH, Irwin D, Kurosu T, Tokunaga K, Sata T, Peterlin BM.** 2004. Human APOBEC3F is  
431 another host factor that blocks human immunodeficiency virus type 1 replication. *J Virol*  
432 **78**:6073-6076.
- 433 16. **Cen S, Guo F, Niu M, Saadatmand J, Deflassieux J, Kleiman L.** 2004. The interaction between  
434 HIV-1 Gag and APOBEC3G. *J Biol Chem* **279**:33177-33184.
- 435 17. **Huthoff H, Autore F, Gallois-Montbrun S, Fraternali F, Malim MH.** 2009. RNA-dependent  
436 oligomerization of APOBEC3G is required for restriction of HIV-1. *PLoS Pathog* **5**:e1000330.
- 437 18. **Apolonia L, Schulz R, Curk T, Rocha P, Swanson CM, Schaller T, Ule J, Malim MH.** 2015.  
438 Promiscuous RNA binding ensures effective encapsidation of APOBEC3 proteins by HIV-1. *PLoS*  
439 *Pathog* **11**:e1004609.
- 440 19. **Burnett A, Spearman P.** 2007. APOBEC3G multimers are recruited to the plasma membrane for  
441 packaging into human immunodeficiency virus type 1 virus-like particles in an RNA-dependent  
442 process requiring the NC basic linker. *J Virol* **81**:5000-5013.
- 443 20. **Svarovskaia ES, Xu H, Mbisa JL, Barr R, Gorelick RJ, Ono A, Freed EO, Hu WS, Pathak VK.** 2004.  
444 Human apolipoprotein B mRNA-editing enzyme-catalytic polypeptide-like 3G (APOBEC3G) is  
445 incorporated into HIV-1 virions through interactions with viral and nonviral RNAs. *J Biol Chem*  
446 **279**:35822-35828.
- 447 21. **Holmes RK, Koning FA, Bishop KN, Malim MH.** 2007. APOBEC3F can inhibit the accumulation of  
448 HIV-1 reverse transcription products in the absence of hypermutation: Comparisons with  
449 APOBEC3G. *J Biol Chem* **282**:2587-2595.
- 450 22. **Sanchez-Martinez S, Aloia AL, Harvin D, Mirro J, Gorelick RJ, Jern P, Coffin JM, Rein A.** 2012.  
451 Studies on the restriction of murine leukemia viruses by mouse APOBEC3. *PLoS ONE* **7**:e38190.
- 452 23. **Okeoma CM, Lovsin N, Peterlin BM, Ross SR.** 2007. APOBEC3 inhibits mouse mammary tumour  
453 virus replication in vivo. *Nature* **445**:927-930.
- 454 24. **MacMillan AL, Kohli RM, Ross SR.** 2013. APOBEC3 inhibition of mouse mammary tumor virus  
455 infection: the role of cytidine deamination versus inhibition of reverse transcription. *J Virol*  
456 **87**:4808-4817.
- 457 25. **Stavrou S, Nitta T, Kotla S, Ha D, Nagashima K, Rein AR, Fan H, Ross SR.** 2013. Murine leukemia  
458 virus glycosylated Gag blocks apolipoprotein B editing complex 3 and cytosolic sensor access to  
459 the reverse transcription complex. *Proc Natl Acad Sci U S A* **110**:9078-9083.
- 460 26. **Stavrou S, Zhao W, Blouch K, Ross SR.** 2018. Deaminase-Dead Mouse APOBEC3 Is an In Vivo  
461 Retroviral Restriction Factor. *J Virol* **92**.
- 462 27. **Nair S, Sanchez-Martinez S, Ji X, Rein A.** 2014. Biochemical and biological studies of mouse  
463 APOBEC3. *J Virol* **88**:3850-3860.
- 464 28. **Cadena C, Stavrou S, Manzoni T, Iyer SS, Bibollet-Ruche F, Zhang W, Hahn BH, Browne EP, Ross**  
465 **SR.** 2016. The effect of HIV-1 Vif polymorphisms on A3G anti-viral activity in an in vivo mouse  
466 model. *Retrovirology* **13**:45.

- 467 29. **Stavrou S, Crawford D, Blouch K, Browne EP, Kohli RM, Ross SR.** 2014. Different modes of  
468 retrovirus restriction by human APOBEC3A and APOBEC3G in vivo. *PLoS Pathog* **10**:e1004145.
- 469 30. **Rulli SJ, Jr., Mirro J, Hill SA, Lloyd P, Gorelick RJ, Coffin JM, Derse D, Rein A.** 2008. Interactions  
470 of murine APOBEC3 and human APOBEC3G with murine leukemia viruses. *Journal of virology*  
471 **82**:6566-6575.
- 472 31. **Kaiser SM, Emerman M.** 2006. Uracil DNA glycosylase is dispensable for human  
473 immunodeficiency virus type 1 replication and does not contribute to the antiviral effects of the  
474 cytidine deaminase APOBEC3G. *Journal of virology* **80**:875-882.
- 475 32. **Yang B, Chen K, Zhang C, Huang S, Zhang H.** 2007. Virion-associated uracil DNA glycosylase-2  
476 and apurinic/aprimidinic endonuclease are involved in the degradation of APOBEC3G-edited  
477 nascent HIV-1 DNA. *J Biol Chem* **282**:11667-11675.
- 478 33. **Langlois MA, Neuberger MS.** 2008. Human APOBEC3G can restrict retroviral infection in avian  
479 cells and acts independently of both UNG and SMUG1. *J Virol* **82**:4660-4664.
- 480 34. **Weil AF, Ghosh D, Zhou Y, Seiple L, McMahon MA, Spivak AM, Siliciano RF, Stivers JT.** 2013.  
481 Uracil DNA glycosylase initiates degradation of HIV-1 cDNA containing misincorporated dUTP  
482 and prevents viral integration. *Proc Natl Acad Sci U S A* **110**:E448-457.
- 483 35. **Sousa MM, Krokan HE, Slupphaug G.** 2007. DNA-uracil and human pathology. *Mol Aspects Med*  
484 **28**:276-306.
- 485 36. **Yan N, O'Day E, Wheeler LA, Engelman A, Lieberman J.** 2011. HIV DNA is heavily uracilated,  
486 which protects it from autointegration. *Proceedings of the National Academy of Sciences of the*  
487 *United States of America* **108**:9244-9249.
- 488 37. **Bruce JW, Hierl M, Young JA, Ahlquist P.** 2010. Cellular transcription factor ZASC1 regulates  
489 murine leukemia virus transcription. *J Virol* **84**:7473-7483.
- 490 38. **Goila-Gur R, Strebel K.** 2008. HIV-1, APOBEC, and intrinsic immunity. *Retrovirol*  
491 **doi:10.1186/1742-4690-5-51**.
- 492 39. **Matreyek KA, Engelman A.** 2013. Viral and cellular requirements for the nuclear entry of  
493 retroviral preintegration nucleoprotein complexes. *Viruses* **5**:2483-2511.
- 494 40. **Dharan A, Bachmann N, Talley S, Zwickelmaier V, Campbell EM.** 2020. Nuclear pore blockade  
495 reveals that HIV-1 completes reverse transcription and uncoating in the nucleus. *Nat Microbiol*  
496 **5**:1088-1095.
- 497 41. **Selyutina A, Persaud M, Lee K, KewalRamani V, Diaz-Griffero F.** 2020. Nuclear Import of the  
498 HIV-1 Core Precedes Reverse Transcription and Uncoating. *Cell Rep* **32**:108201.
- 499 42. **Li C, Burdick RC, Nagashima K, Hu WS, Pathak VK.** 2021. HIV-1 cores retain their integrity until  
500 minutes before uncoating in the nucleus. *Proc Natl Acad Sci U S A* **118**.
- 501 43. **Francis AC, Marin M, Singh PK, Achuthan V, Prellberg MJ, Palermينو-Rowland K, Lan S,**  
502 **Tedbury PR, Sarafianos SG, Engelman AN, Melikyan GB.** 2020. HIV-1 replication complexes  
503 accumulate in nuclear speckles and integrate into speckle-associated genomic domains. *Nat*  
504 *Commun* **11**:3505.
- 505 44. **Zavorotinskaya T, Qian Z, Franks J, Albritton LM.** 2004. A point mutation in the binding subunit  
506 of a retroviral envelope protein arrests virus entry at hemifusion. *J Virol* **78**:473-481.
- 507 45. **Fan H, Chute H, Chao E, Feuerman M.** 1983. Construction and characterization of Moloney  
508 murine leukemia virus mutants unable to synthesize glycosylated gag polyprotein. *Proc Natl*  
509 *Acad Sci USA* **80**:5965-5969.
- 510 46. **Li H.** 2013. Aligning sequence reads, clone sequences and assembly contigs with BWA-MEM.  
511 *ArXiv* **1303.3997v1 [q-bio.GN]**.
- 512 47. **Levy S, Hannenhalli S.** 2002. Identification of transcription factor binding sites in the human  
513 genome sequence. *Mamm Genome* **13**:510-514.

- 514 48. **McKenna A, Hanna M, Banks E, Sivachenko A, Cibulskis K, Kernytsky A, Garimella K, Altshuler**  
515 **D, Gabriel S, Daly M, DePristo MA.** 2010. The Genome Analysis Toolkit: a MapReduce  
516 framework for analyzing next-generation DNA sequencing data. *Genome Res* **20**:1297-1303.
- 517 49. **Suzuki K, Bose P, Leong-Quong RY, Fujita DJ, Riabowol K.** 2010. REAP: A two minute cell  
518 fractionation method. *BMC Res Notes* **3**:294.
- 519 50. **Hirt B.** 1967. Selective extraction of polyoma DNA from infected mouse cell cultures. *J Mol Biol*  
520 **26**:365-369.
- 521 51. **Meshesha M, Esadze A, Cui J, Churgulia N, Sahu SK, Stivers JT.** 2020. Deficient uracil base  
522 excision repair leads to persistent dUMP in HIV proviruses during infection of monocytes and  
523 macrophages. *PLoS One* **15**:e0235012.

524

525

526 Table 1: Primers used to amplify MMLV proviral DNA and viral RNA genome.

| Coverage (nt) | Nucleic Acid | Forward                     | Reverse                     |
|---------------|--------------|-----------------------------|-----------------------------|
| 1-2884        | DNA          | 5'GCCCTCAGCAGTTTCTAGAGAAC3' | 5'CGTGTTCAGGGGACTGGCA3'     |
| 72-2884       | RNA          | 5'ACTTGTGGTCTCGCTGTTC3'     | 5'CGTGTTCAGGGGACTGGCA3'     |
| 2864-5944     | DNA/RNA      | 5'TGCCAGTCCCCCTGGAACAC3'    | 5'CGTCTCCCGATCTCCATTGG3'    |
| 5925-8120     | DNA/RNA      | 5'CCAATGGAGATCGGGAGACG3'    | 5'GTTCTCTAGAAACTGCTGAGGGC3' |

527

528

### 529 Figure Legends

530 **Fig. 1. APOBEC3G restrict murine retrovirus infection *in vivo*, in both the presence and**

531 **absence of UNG.** A) Newborn mice of the indicated genotypes were infected with  $2 \times 10^3$

532 infectious center units (ICs) of MLV, sacrificed at 16 days dpi, and virus titers in spleens were

533 measured. N= 11 APO<sup>-/-</sup>, 19 UNG<sup>-/-</sup>APO<sup>-/-</sup>, 10 A3G<sup>high</sup>APO<sup>-/-</sup> and 23 A3G<sup>high</sup>UNG<sup>-/-</sup> APO<sup>-/-</sup> mice.

534 B) DNA was isolated from spleens at 16 dpi and subjected to qPCR with primers specific to

535 MMLV Env (SuMLV). N= 13 APO<sup>-/-</sup>, 9 UNG<sup>-/-</sup>APO<sup>-/-</sup>, 8 A3G<sup>high</sup>APO<sup>-/-</sup> and 13 A3G<sup>high</sup>UNG<sup>-/-</sup>

536 APO<sup>-/-</sup> mice. C) Viral RNA levels were analyzed by RT-qPCR from spleens at 16 dpi. N= 5 APO<sup>-/-</sup>,

537 5 UNG<sup>-/-</sup>APO<sup>-/-</sup>, 5 A3G<sup>high</sup>APO<sup>-/-</sup> and 6 A3G<sup>high</sup>UNG<sup>-/-</sup> APO<sup>-/-</sup> mice. D) Mice infected with

538 MMLV were bled at 1-month post-infection, and virus titers in plasma were measured. N= 14

539 APO<sup>-/-</sup>, 18 UNG<sup>-/-</sup>APO<sup>-/-</sup>, 23 A3G<sup>high</sup>APO<sup>-/-</sup> and 22 A3G<sup>high</sup>UNG<sup>-/-</sup> APO<sup>-/-</sup> mice. E) DNA was

540 isolated from PBMCs at 1-month post-infection and subject to qPCR with SuMLV primers. For A-

541 E, each point represents the data obtained from an individual mouse; the average for each

542 group is shown by a horizontal bar (limit of detection = 200 copies/mL; dashed line). F) Fraction

543 of proviral DNA from spleen at 16 dpi that contain uracil as determined by the Ex-qPCR method,



544 using SuMLV primers specific to the *env* gene. G) Fraction of proviruses from PMBCs at 1-month  
545 post-infection that contain uracil as determined by Ex-qPCR. Values represent the mean  $\pm$  SD  
546 from at least 7 different mice. Unpaired two-tailed t tests were used to determine significance.  
547 \*\*\*\*,  $P \leq 0.0001$ ; \*\*,  $P \leq 0.006$ ; \*,  $P \leq 0.05$ ; ns, not significant. H) DNA isolated from the spleens  
548 of MLV-infected mice of the indicated genotypes at 16 dpi was amplified with Taq or Pfu  
549 polymerase. Each lane is DNA from an individual mouse.

550

551 **Figure 2. Deamination in the proviral DNA of infected transgenic mice.** A) The MLV provirus is  
552 shown with the locations of six primers that cover the viral genome. B) DNA was isolated from  
553 spleens at 16 dpi and subjected to NextGen sequencing to determine G-to-A mutations, all  
554 other mutations and C to T mutations in the proviral DNA. C) G-to-A mutations present across  
555 the proviral genome. Red arrows show two hotspots for APOBEC3G mutations in the *gag* (1000  
556 – 3000) and *env* (6000 – 8000) genes. The percent of GG context in each region of the provirus  
557 is showed below the x-axis. Each point represents the G-to-A, C-to-T, or all other mutations per  
558 kb obtained from an individual mouse. N= 11 APO<sup>-/-</sup>, 5 UNG<sup>-/-</sup>APO<sup>-/-</sup>, 4 A3G<sup>high</sup>APO<sup>-/-</sup> and 13  
559 A3G<sup>high</sup>UNG<sup>-/-</sup> APO<sup>-/-</sup> mice. D) Bar chart showing the percentage of G-to-A mutations in the GG  
560 context in proviral DNA. E) G-to-A mutations in the U3/R and U5 regions. Numbering refers to  
561 position in viral RNA. Red arrows indicate GREs and blue arrows NFAT1 consensus sequences.  
562 Two-way ANOVA with Tukey's multiple-comparison test was used to determine significance.  
563 \*\* $P \leq 0.001$ ; \*\*\*\*,  $P \leq 0.0001$ ; ns, not significant.

564

565 **Figure 3. G-to-A mutations in the viral RNA of infected transgenic mice.** A) RNA was isolated  
566 from spleens at 16 dpi and subjected to NextGen sequencing to determine G-to-A mutations  
567 and all other mutations in the viral RNA. B) Comparison of G-to-A mutations between DNA and  
568 RNA in A3G<sup>high</sup>UNG<sup>-/-</sup> APO<sup>-/-</sup> mice and A3G<sup>high</sup>APO<sup>-/-</sup> mice are shown. C) G-to-A mutations that  
569 cause nonsynonymous mutations and stop codons were analyzed in DNA and RNA. Comparison  
570 of the level of nonsynonymous mutations and stop codons between DNA and RNA in  
571 A3G<sup>high</sup>UNG<sup>-/-</sup> APO<sup>-/-</sup> mice and A3G<sup>high</sup>APO<sup>-/-</sup> mice are shown. Each point represents the G-  
572 to-A or all other mutations per kb obtained from an individual mouse. N= 5 APO<sup>-/-</sup>, 4 UNG<sup>-/-</sup>  
573 APO<sup>-/-</sup>, 3 A3G<sup>high</sup>APO<sup>-/-</sup> and 9 A3G<sup>high</sup>UNG<sup>-/-</sup> APO<sup>-/-</sup> mice. ANOVA with Tukey's multiple-  
574 comparison test was used to determine significance. \*\*\*\*,  $P \leq 0.0001$ ; \*\*\*,  $P \leq 0.001$ ; \*\*,  $P \leq 0.01$ ;  
575 \*,  $P < 0.05$ ; ns, not significant.

576

577 **Figure 4. UNG removes uracils from unintegrated nuclear DNA and avoids integration.** A) Left  
578 panel: western blots showing MLV viruses from the different cell lines used, and APOBEC3G  
579 expression in MLV virus from A3G MCAT cells; the panel on the right shows the UNG  
580 knockdown. B) Fractionation and western blots of the cells used in part C. Laminin B1 and  $\alpha$ -  
581 tubulin were used as markers for the nucleus and cytoplasm, respectively. C) Equal amounts of  
582 MLV were used to infect 293-MCAT cells which were transfected with UNG or control siRNAs, at  
583 2, 4, 6, 8, and 24 hpi, the cell extracts were fractionated into total, cytoplasmic, unintegrated  
584 nuclear and integrated fractions. DNA was isolated from each of the fractions and subjected to  
585 qPCR to measure viral DNA levels using SuMLV primers for total, cytoplasmic and unintegrated  
586 nuclear fractions. Integrated MLV DNA quantification was performed by real-time Alu-gag

587 qPCR. Values were normalized to GAPDH for total and nuclear fractions, to mCytb for  
588 cytoplasmic fraction and to total DNA for the unintegrated nuclear fraction. Each point shows  
589 the averages  $\pm$  SD of 3 different experiments. Two-way analysis of variance (ANOVA) with  
590 Tukey's or Šídák's multiple-comparison test was used to determine significance. \*\*\*\*,  $P$   
591  $<0.0001$ ; \*\*\*,  $P <0.001$ ; \*  $P < 0.05$ . D) Ex-qPCR method with SuMLV primers was used to  
592 determine the fraction of viruses containing uracils in the cytoplasmic, unintegrated and high  
593 molecular weight nuclear fractions at 6 hpi. Bars show the average  $\pm$  SD of 4 different  
594 experiments. One-way ANOVA with Tukey's multiple-comparison test was used to determine  
595 significance. \*\*,  $P \leq 0.01$ ; ns, not significant.

596

597

598

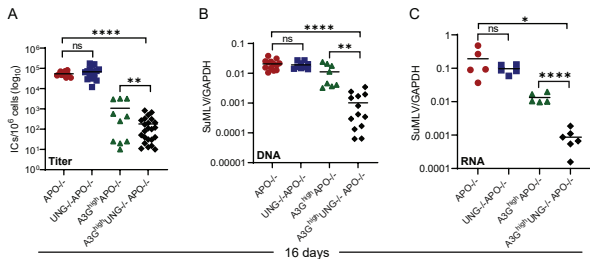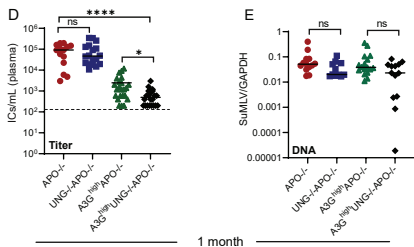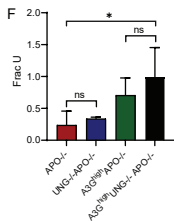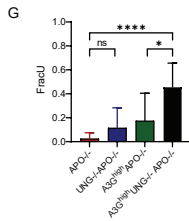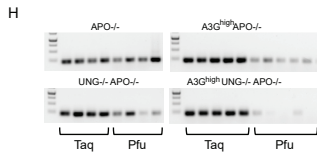

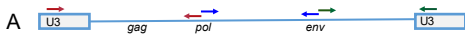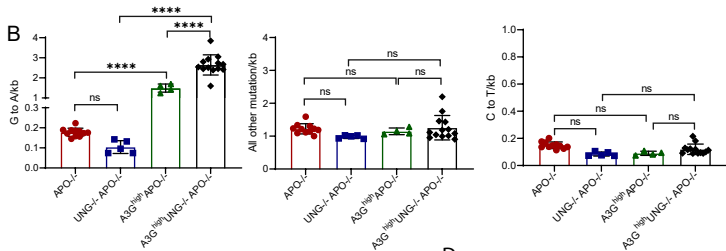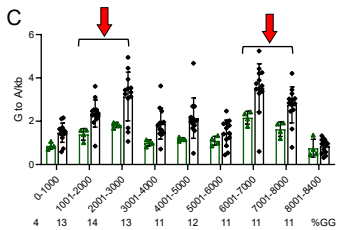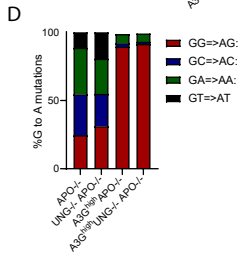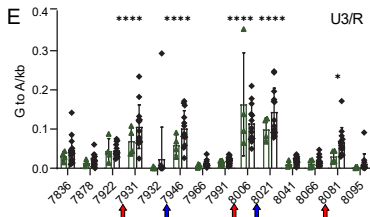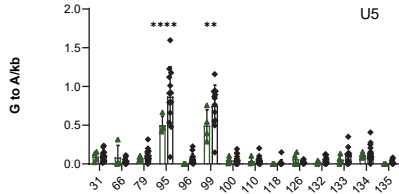

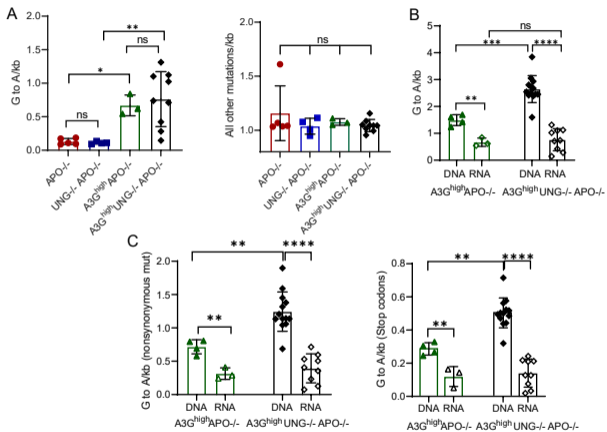

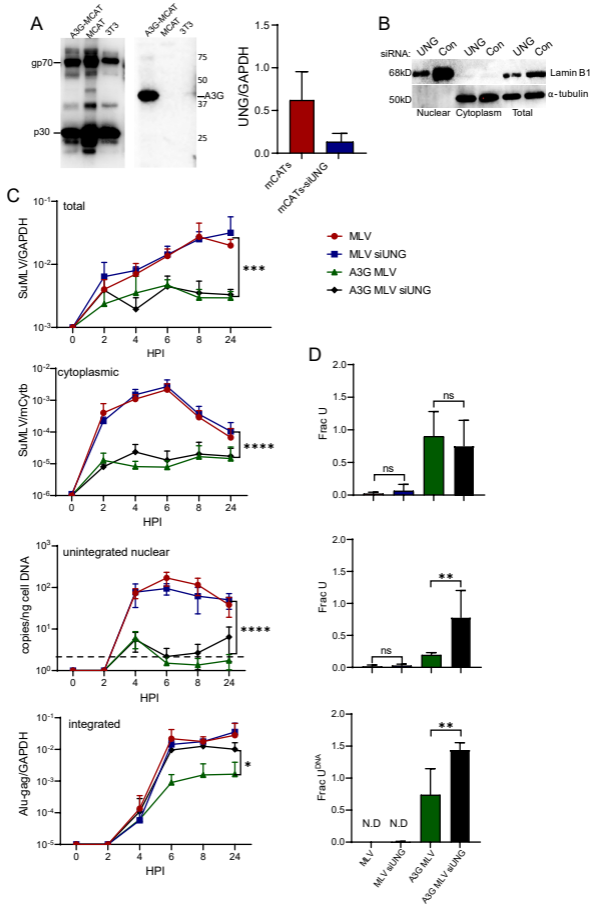

Source: http://biorxiv.org/content/10.1101/2021.08.25.457690v1.full.pdf
